# Supplementary material for: Morphology- and defect-coordinated prominent microwave absorption, thermal exhaustion, and electrical insulation in SnO2@SnP2O7@Sn2P2O7 hierarchical architectures
Source: Royal Society of Chemistry journal article supplement (doi:10.1039/d4ta01541j), 2024-01-01
Supplement: d4ta01541j1.pdf [file d4ta01541j1.pdf]

## Electronic Supplementary Information

For

### Morphology- and defect-coordinated prominent microwave absorption, thermal exhaustion, and electrical insulation in SnO<sub>2</sub>@SnP<sub>2</sub>O<sub>7</sub>@Sn<sub>2</sub>P<sub>2</sub>O<sub>7</sub> hierarchical architectures

Xinyu Liu†, Siyu Xie†, Shiyang Cai†, Kang Fu†, Xiangyang Liu†, Lingling Lin†, Zhenjie Yu†, Guoxiu Tong \* †, Wenhua Wu†

†College of Chemistry and Material Sciences, Key Laboratory of the Ministry of Education for Advanced Catalysis Materials, Zhejiang Normal University, Jinhua 321004, China.

\* **Corresponding Authors:** E-mail: [tonggx@zjnu.cn](mailto:tonggx@zjnu.cn) (G.X. Tong); Tel.: +86-579-82282269; Fax: +86-579-82282269.

Seen from Figure 8b1 and 8b2, matching constant ( $Z$ ) varies in the following trend:  $Z_{S4} < Z_{S2} < Z_{S1} \approx Z_{S5} < Z_{S4P} < Z_{S3}$  at 2~11 GHz;  $Z_{S4} < Z_{S4P} < Z_{S5} \approx Z_{S2} < Z_{S1} < Z_{S3}$  at 11~18 GHz. The  $Z$  presents an upward trend with  $f$  with large values over 4~18 GHz. The prominent matching performance is mainly ascribed to inner stress/oxygen vacancy defects caused by [Sn<sup>2+</sup>]. In addition to increasing permittivity and conductivity, P doping tunes the balance between conductivity loss and polarization loss.

While the AC takes on a weak resonance peak over 2.0~9.0 GHz and a strong resonance peak over 9.0~18.0 GHz, indicating that the EM wave absorption of the HAs mainly focuses on the 9.0~18.0 GHz. The AC values fluctuate in a small scale.

Attenuating constant ( $AC$ ) increases in the following order:  $AC_{S4P} < AC_{S5} \approx AC_{S3} \approx AC_{S4} < AC_{S1} \approx AC_{S2}$  at 2~13 GHz;  $AC_{S2} \approx AC_{S1} < AC_{S5} < AC_{S4} < AC_{S3} < AC_{S4P}$  at 13~18 GHz. The high AC corresponds to the large absorption (or low  $RL_{min}$ , Table S1), meaning that more EM waves are dampened or converted into thermal energy as they enter absorbing layers. The strong attenuation capability is due to

the cooperative effects of multiple polarization loss, conductive loss, and multiple scattering as a result of defects and hierarchical architecture.

Matching constant ( $Z$ ) and attenuating constant ( $AC$ ) are two crucial factors, which determine the wide EAB and strong absorption. The values of  $Z$  and  $AC$  usually are obtained respectively from the expressions:

$$AC = \frac{\sqrt{2\pi}f}{c} \times \sqrt{(\mu''\varepsilon'' - \mu'\varepsilon') + \sqrt{(\mu''\varepsilon'' - \mu'\varepsilon')^2 + (\mu'\varepsilon'' + \mu''\varepsilon')^2}} \quad \text{and}$$

$$Z = \left| \frac{Z_{in}}{Z_0} \right| = \left| \frac{\mu_r}{\varepsilon_r} \tan h \left( j \frac{2\pi f d}{c} \sqrt{\mu_r \varepsilon_r} \right) \right|.$$

The  $Z$  presents an upward trend with  $f$ ; while the  $AC$  takes on a weak resonance peak over 2~8 GHz and a strong resonance peak over 8~18 GHz.

**Table S1.** MWACs summarization of SnO<sub>2</sub>-based absorption materials. <sup>2,7-20,46,47</sup>

| Absorbers                                                                                            | Loading amount (%) | Optimal $R_L$ value (dB) | $f$ (GHz) (optimal $R_L$ ) | $d_w$ (mm) ( $R_L < -10$ dB) | EAB (GHz) ( $R_L < -10$ dB) | EAB/d (GHz/mm) | Ref.      |
|------------------------------------------------------------------------------------------------------|--------------------|--------------------------|----------------------------|------------------------------|-----------------------------|----------------|-----------|
| SnO <sub>2</sub> @ZnO                                                                                | 80                 | -23.5                    | 9.20                       | 12.0                         | 3.50                        | 0.29           | 7         |
| Fe <sub>3</sub> O <sub>4</sub> @SnO <sub>2</sub> nanochains                                          | 50                 | -39.4                    | 5.67                       | 5.5                          | 1.70                        | 0.31           | 9         |
| Fe-doped SnO <sub>2</sub> @RGO                                                                       | 60                 | -29.0                    | 16.50                      | 5.3                          | 2.70                        | 0.51           | 11        |
| SnO <sub>2</sub> -graphene                                                                           | 50                 | -15.3                    | 15.94                      | 2.0                          | 1.30                        | 0.65           | 12        |
| Ni/SnO <sub>2</sub>                                                                                  | 70                 | -21.7                    | 8.60                       | 3.0                          | 2.80                        | 0.93           | 13        |
| Sb <sub>2</sub> O <sub>3</sub> /SnO <sub>2</sub> /mica                                               | 20                 | -25.6                    | 11.80                      | 2.4                          | 3.10                        | 1.29           | 8         |
| Fe <sub>3</sub> O <sub>4</sub> /SnO <sub>2</sub> nanorods                                            | 80                 | -27.4                    | 16.72                      | 2.0                          | 2.60                        | 1.30           | 10        |
| core-shell Ni/SnO <sub>2</sub> composites                                                            | 50                 | -45.0                    | 13.90                      | 1.8                          | 3.80                        | 2.11           | 14        |
| embroidered ball-shaped SnO <sub>2</sub>                                                             | 70                 | -45.6                    | 12.40                      | 2.6                          | 6.08                        | 2.34           | 20        |
| Ni-doped SnO <sub>2</sub> @MWCNTs                                                                    | 33                 | -39.2                    | 8.20                       | 1.5                          | 3.60                        | 2.40           | 15        |
| SnO <sub>2</sub> @PPy hybrid aerogels                                                                | 10                 | -46.1                    | 10.24                      | 3.0                          | 7.28                        | 2.42           | 17        |
| SnO <sub>2</sub> /Fe <sub>3</sub> O <sub>4</sub> /MWCNT                                              | 70                 | -42.0                    | 10.90                      | 1.5                          | 3.80                        | 2.53           | 16        |
| honeycomb SnO <sub>2</sub> Foams                                                                     | 30                 | -37.6                    | 17.10                      | 2.0                          | 5.60                        | 2.80           | 46        |
| Ni@void@SnO <sub>2</sub>                                                                             | 50                 | -29.7                    | 15.20                      | 1.7                          | 4.80                        | 2.82           | 47        |
| AgNWs-CoNi@Sn(OH) <sub>2</sub> /SnO <sub>2</sub>                                                     | 50                 | -37.8                    | 6.40                       | 2.0                          | 5.80                        | 2.90           | 18        |
| Fe doped SnO <sub>2</sub> /C                                                                         | 33                 | -44.5                    | 15.44                      | 1.5                          | 4.50                        | 3.00           | 19        |
| SnO/SnO <sub>2</sub> nanosheets                                                                      | 25                 | -37.6                    | 15.20                      | 1.4                          | 4.30                        | 3.07           | 2         |
| Sn <sub>2</sub> PO <sub>4</sub> Cl S4P                                                               | 50                 | -46.98                   | 12.48                      | 2.1                          | 5.60                        | 2.67           |           |
| SnO <sub>2</sub> @SnP <sub>2</sub> O <sub>7</sub> @Sn <sub>2</sub> P <sub>2</sub> O <sub>7</sub> -S1 | 50                 | -44.92                   | 16.64                      | 2.4                          | 6.48                        | 2.70           |           |
| SnO <sub>2</sub> @SnP <sub>2</sub> O <sub>7</sub> @Sn <sub>2</sub> P <sub>2</sub> O <sub>7</sub> -S2 | 50                 | -47.33                   | 16.64                      | 2.2                          | 6.32                        | 2.87           | This work |
| SnO <sub>2</sub> @SnP <sub>2</sub> O <sub>7</sub> @Sn <sub>2</sub> P <sub>2</sub> O <sub>7</sub> -S3 | 50                 | -39.09                   | 17.68                      | 2.7                          | 6.72                        | 2.49           | work      |
| SnO <sub>2</sub> @SnP <sub>2</sub> O <sub>7</sub> @Sn <sub>2</sub> P <sub>2</sub> O <sub>7</sub> -S4 | 50                 | -36.61                   | 12.96                      | 2.0                          | 6.48                        | 3.24           |           |
| SnO <sub>2</sub> @SnP <sub>2</sub> O <sub>7</sub> @Sn <sub>2</sub> P <sub>2</sub> O <sub>7</sub> -S5 | 50                 | -35.01                   | 12.16                      | 2.2                          | 5.92                        | 2.69           |           |

**Table S2.** Heat conductance summarization of SnO<sub>2</sub>-based composites.<sup>21–24,26–29,48–60</sup>

| Filler                                                                                               | Matrix                                 | Loading (%) | Heat conductance (W/m·K) | Ref.      |
|------------------------------------------------------------------------------------------------------|----------------------------------------|-------------|--------------------------|-----------|
| SiO <sub>2</sub> /SnO <sub>2</sub> nanofibers                                                        | SiO <sub>2</sub> aerogel               | 8           | 0.025                    | 48        |
| SnO                                                                                                  | Polystyrene /<br>unsaturated polyester | 1           | 0.172                    | 49        |
| Sb-SnO <sub>2</sub> /CM                                                                              | poplypropylene                         | 70          | 0.187                    | 28        |
| SnO <sub>2</sub> /EG nanofluids                                                                      | ethylene glycol                        | 25          | 0.277                    | 26        |
| CsCoPO <sub>4</sub>                                                                                  | Ceramics                               | 100         | 0.35                     | 21        |
| MWCNTs/Sb-SnO <sub>2</sub>                                                                           | Thermoplastic polyurethane             | 10          | 0.36                     | 29        |
| SnO <sub>2</sub> /rGO nanofluids                                                                     | water                                  | 0.1         | 0.63                     | 27        |
| T-ZnO                                                                                                | silicone oil                           | 70          | 0.83                     | 50        |
| b-Al <sub>2</sub> O <sub>3</sub>                                                                     | epoxy resin                            | 70          | 1.13                     | 51        |
| SnO <sub>x</sub> /Si <sub>3</sub> N <sub>4</sub> films                                               | Ceramics                               | 100         | 1.24                     | 24        |
| TiO <sub>2</sub> /Fe/C                                                                               | silicone                               | 45          | 1.87                     | 52        |
| SnO <sub>2</sub> /Y <sub>2</sub> O <sub>3</sub> /ZrO <sub>2</sub>                                    | Ceramics                               | 100         | 1.98                     | 23        |
| Al <sub>2</sub> O <sub>3</sub> /Ni/C                                                                 | silicone                               | 30          | 2.84                     | 53        |
| Ti <sub>0.8</sub> Sn <sub>0.2</sub> O <sub>2</sub>                                                   | ceramic                                | 100         | 3.2                      | 54        |
| CNF/Fe <sub>x</sub> O <sub>y</sub>                                                                   | silicone                               | 30          | 3.22                     | 55        |
| Sn <sup>2+</sup> doped fluorophosphate glass                                                         | ceramic                                | 100         | 3.25                     | 22        |
| Fe-doped CeO <sub>2</sub> /Ce(OH) <sub>3</sub>                                                       | silicone                               | 45          | 3.442                    | 56        |
| MgO/Ni/MWCNT                                                                                         | silicone                               | 40          | 3.61                     | 57        |
| graphene foams                                                                                       | silicone                               | 5           | 3.95                     | 58        |
| MgO/Co/C                                                                                             | silicone                               | 50          | 4.09                     | 59        |
| GN/PPy/Al <sub>2</sub> O <sub>3</sub>                                                                | silicone                               | 50          | 4.649                    | 60        |
| Sn <sub>2</sub> PO <sub>4</sub> Cl S4P                                                               | silicone                               | 20          | 4.003                    |           |
| SnO <sub>2</sub> @SnP <sub>2</sub> O <sub>7</sub> @Sn <sub>2</sub> P <sub>2</sub> O <sub>7</sub> -S1 | silicone                               | 20          | 3.835                    |           |
| SnO <sub>2</sub> @SnP <sub>2</sub> O <sub>7</sub> @Sn <sub>2</sub> P <sub>2</sub> O <sub>7</sub> -S2 | silicone                               | 20          | 4.394                    | This work |
| SnO <sub>2</sub> @SnP <sub>2</sub> O <sub>7</sub> @Sn <sub>2</sub> P <sub>2</sub> O <sub>7</sub> -S3 | silicone                               | 20          | 4.413                    | work      |
| SnO <sub>2</sub> @SnP <sub>2</sub> O <sub>7</sub> @Sn <sub>2</sub> P <sub>2</sub> O <sub>7</sub> -S4 | silicone                               | 20          | 4.745                    |           |
| SnO <sub>2</sub> @SnP <sub>2</sub> O <sub>7</sub> @Sn <sub>2</sub> P <sub>2</sub> O <sub>7</sub> -S5 | silicone                               | 20          | 4.265                    |           |

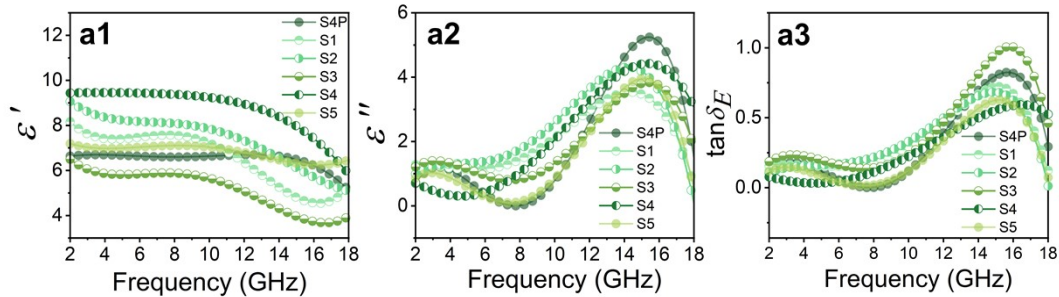**Figure S1.** Frequency characteristics of the Sn<sub>2</sub>PO<sub>4</sub>Cl HAS (S4P) and SnO<sub>2</sub>@SnP<sub>2</sub>O<sub>7</sub>@Sn<sub>2</sub>P<sub>2</sub>O<sub>7</sub> HAS (S1–S5): (a1) the real part ( $\epsilon'$ ) and (a2) imaginary part ( $\epsilon''$ ) of relative complex permittivity, (a3) the dielectric loss ( $\tan\delta_E$ ).

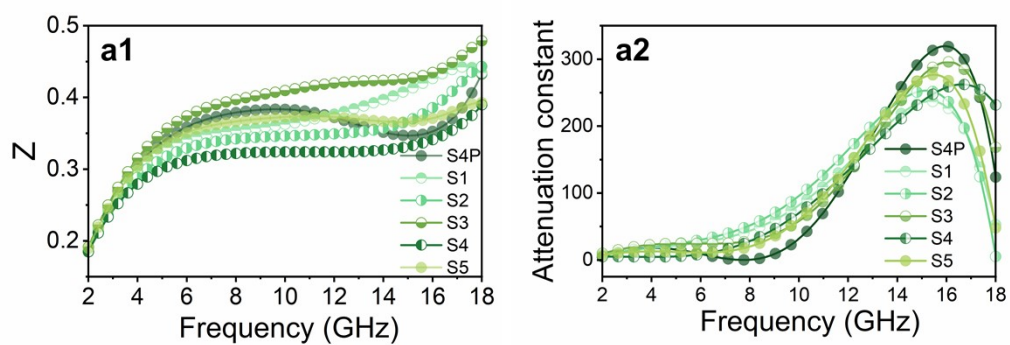

**Figure S2.** Frequency characteristics of the  $\text{Sn}_2\text{PO}_4\text{Cl}$  HAs (S4P) and  $\text{SnO}_2@\text{SnP}_2\text{O}_7@\text{Sn}_2\text{P}_2\text{O}_7$  HAs (S1–S5): (a1) impedance matching ( $Z$ ); (a2) attenuation constant ( $\alpha$ ).

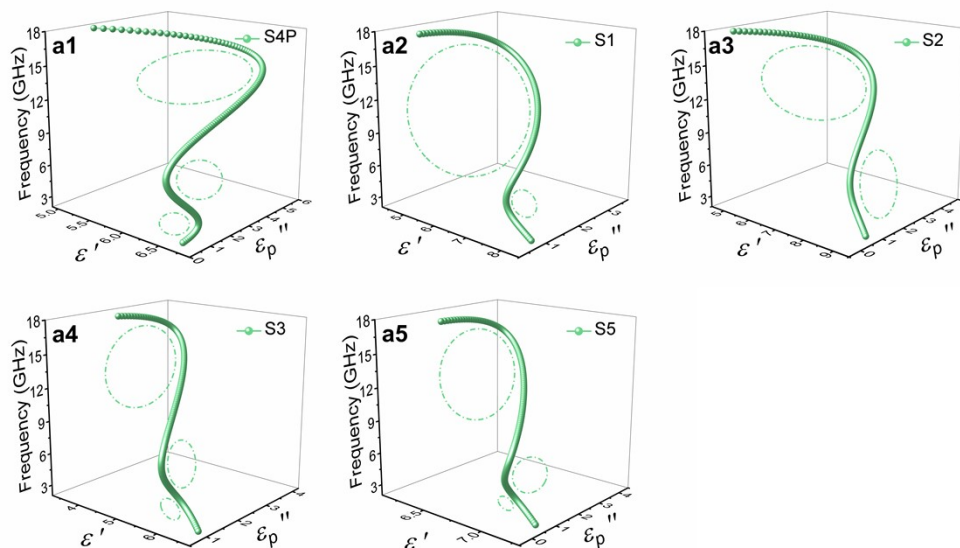

**Figure S3.** (a1–a5) Cole–Cole plots ( $\epsilon'$  versus  $\epsilon''$ ) of the  $\text{Sn}_2\text{PO}_4\text{Cl}$  and  $\text{SnO}_2@\text{SnP}_2\text{O}_7@\text{Sn}_2\text{P}_2\text{O}_7$  HAs.
